# Supplementary material for: Syntheses of two-dimensional propylammonium lead halide perovskite microstructures by a solution route
Source: Royal Society of Chemistry journal article supplement (doi:10.1039/c8ce02005a), 2019-01-01
Supplement: c8ce02005a1.pdf [file c8ce02005a1.pdf]

**Electronic Supplementary Information (ESI) available:**

**Syntheses of two-dimensional propylammonium lead halide  
perovskite microstructures by a solution route**

Dewei Ma\*, Zhousu Xu, Fangjie Wang, Xujun Deng

Department of Applied Physics, Zhejiang University of Technology, Hangzhou

310014, PR China

\* Corresponding author. E-mail: [dwma@zjut.edu.cn](mailto:dwma@zjut.edu.cn)

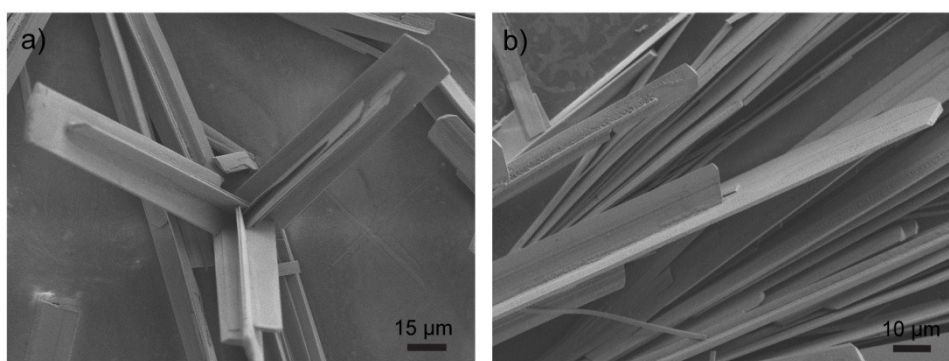

**Fig. S1.** (a) Flower-like hierarchical morphology with the “petals” consisting of approximately vertical-crossing ribbons. (b) The “petal” exhibits approximately vertical-crossing ribbons.

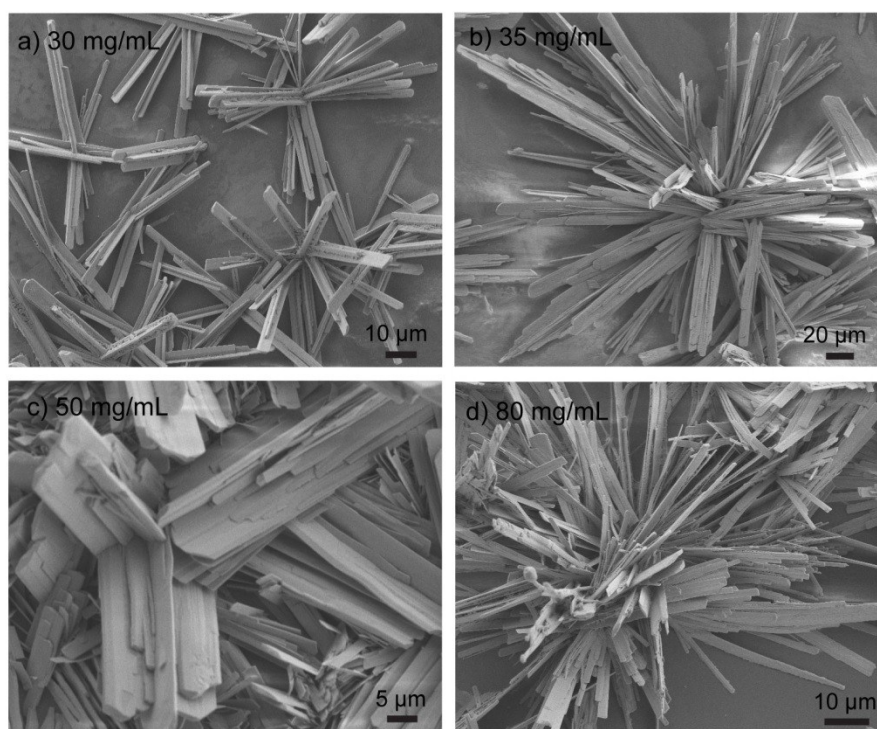

**Fig. S2.** SEM images of the samples grown at different  $\text{C}_3\text{H}_7\text{NH}_3\text{I}$  concentrations of (a) 30 mg/mL, (b) 35 mg/mL, (c) 50 mg/mL and (d) 80 mg/mL.

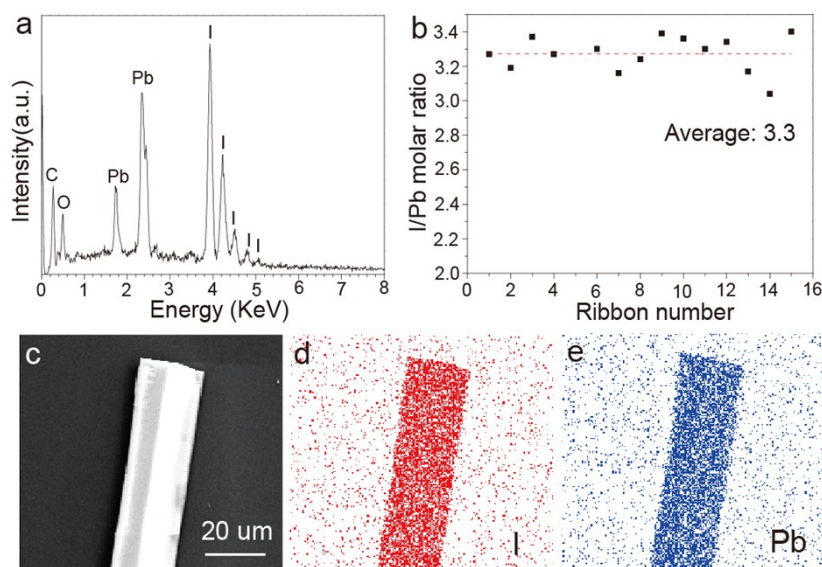

**Fig. S3.** EDX analysis of an individual  $(\text{C}_3\text{H}_7\text{NH}_3)_6\text{Pb}_4\text{I}_{14}$  ribbon. (a) A representative EDX spectrum of a single  $(\text{C}_3\text{H}_7\text{NH}_3)_6\text{Pb}_4\text{I}_{14}$  ribbon. (b) Quantitative elemental analysis of these  $(\text{C}_3\text{H}_7\text{NH}_3)_6\text{Pb}_4\text{I}_{14}$  ribbons yields an average I/Pb molar ratio of 3.3. (c) The selected area SEM image of an individual  $(\text{C}_3\text{H}_7\text{NH}_3)_6\text{Pb}_4\text{I}_{14}$  ribbon and (d, e) Element mapping images of I and Pb for the selected area shown in (c).

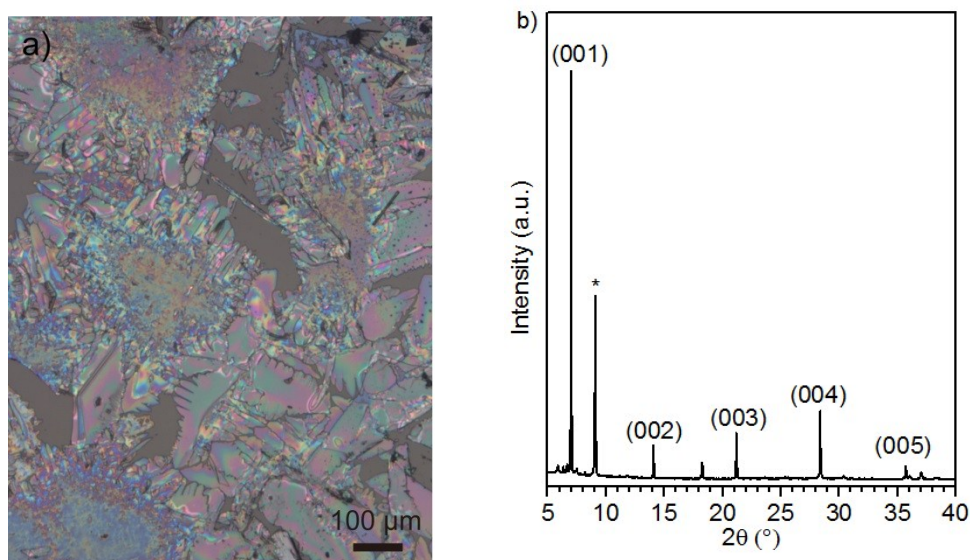

**Fig. S4.** (a) Optical microscopic image and (b) corresponding XRD pattern of  $(\text{C}_3\text{H}_7\text{NH}_3)_2\text{PbBr}_4$  grown at a  $\text{C}_3\text{H}_7\text{NH}_3\text{Br}$  concentration of 5 mg/mL for 8 h at room temperature (the peak marked “\*” is from unreacted  $\text{PbAc}_2$ ).
